# Supplementary material
Source: PubMed Central journal article supplement (PMC6586239)
Supplement: NIHMS1034231-supplement-Supporting_Information.pdf [file NIHMS1034231-supplement-Supporting_Information.pdf]

**Synthesis, physicochemical characterization, and self-assembly of linear, dibranched and  
miktoarm semi-fluorinated triphlic polymers**

W.B. Tucker,<sup>1</sup> A.M. McCoy,<sup>1</sup> S.M. Fix, M.F. Stagg, M.M. Murphy and Sandro Mecozzi<sup>1,2\*</sup>

<sup>1</sup>*Department of Chemistry, <sup>2</sup>School of Pharmacy,*

*University of Wisconsin-Madison,*

*Madison, Wisconsin, 53705 USA*

*smecozzi@wisc.edu*

**Table of Contents**

(20 Pages)

|                                                           |            |
|-----------------------------------------------------------|------------|
| <b>MALDI Spectra</b>                                      | <b>S2</b>  |
| M1-OMs                                                    | S2         |
| M2-OMs                                                    | S2         |
| M5-OMs                                                    | S3         |
| M1H10                                                     | S3         |
| M1H10-O-F3                                                | S4         |
| M1H10-O-F6                                                | S4         |
| M1H10F8                                                   | S5         |
| M1F13                                                     | S5         |
| M5diH10                                                   | S6         |
| M5diH10-O-F3                                              | S6         |
| M5diH10-O-F6                                              | S7         |
| M1 $\mu$ H10F8                                            | S7         |
| M2 $\mu$ H18F8                                            | S8         |
| M2 $\mu$ H18PftB                                          | S8         |
| M15 $\mu$ H18PftB                                         | S9         |
| <b>Surface tension data</b>                               | <b>S10</b> |
| <b>Pyrene CMC data</b>                                    | <b>S13</b> |
| <b>Microviscosity data</b>                                | <b>S15</b> |
| <b>FRET stability data</b>                                | <b>S18</b> |
| <b>Paclitaxel encapsulation (mg mL<sup>-1</sup>) data</b> | <b>S20</b> |

# MALDI spectra

D:\Data\mmv1131002x02i0\_I11

Comment 1 Decato 3726 // CHCA // RP\_PepMix.par  
Comment 2 250 shots, 30% lp (74)

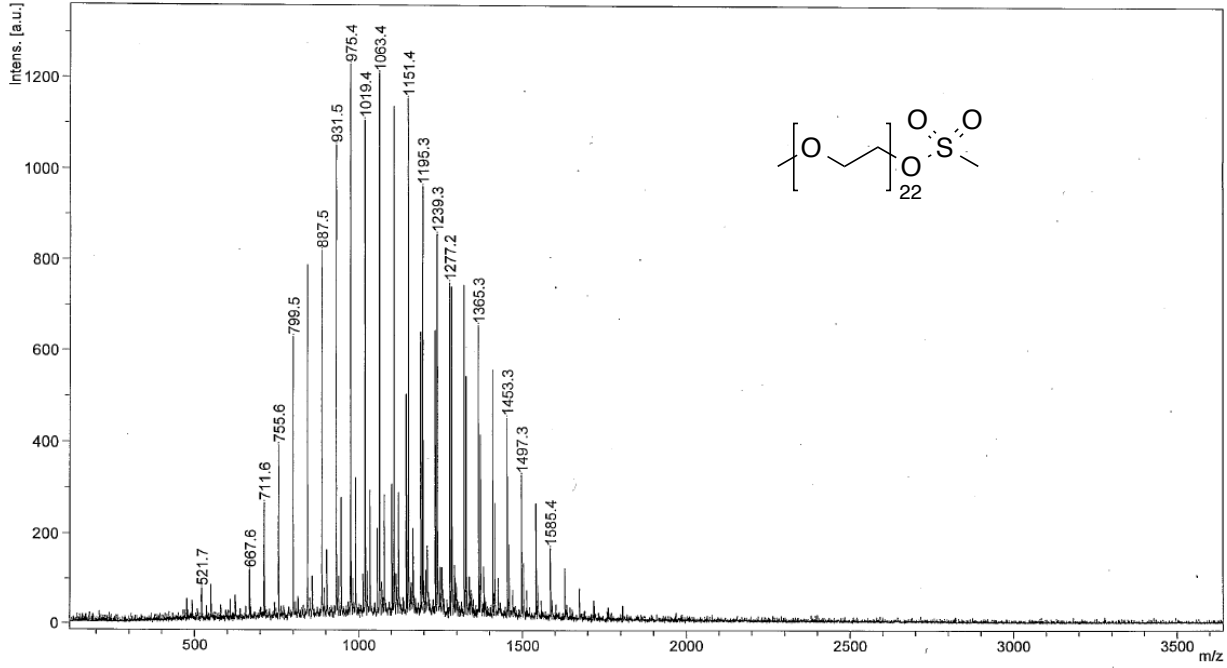

Bruker Ultraflex III, Chem. Dept., Univ. Wisconsin, Cite: NIH NCRR 1S10RR024601-01

printed: 10/2/2013 11:37:06 AM

D:\Data\mmv120112x03i0\_G121

Comment 1 Tucker 118 // CHCA // RP\_PepMix.par  
Comment 2 150 shots, 70% lp (68), 120-3640d

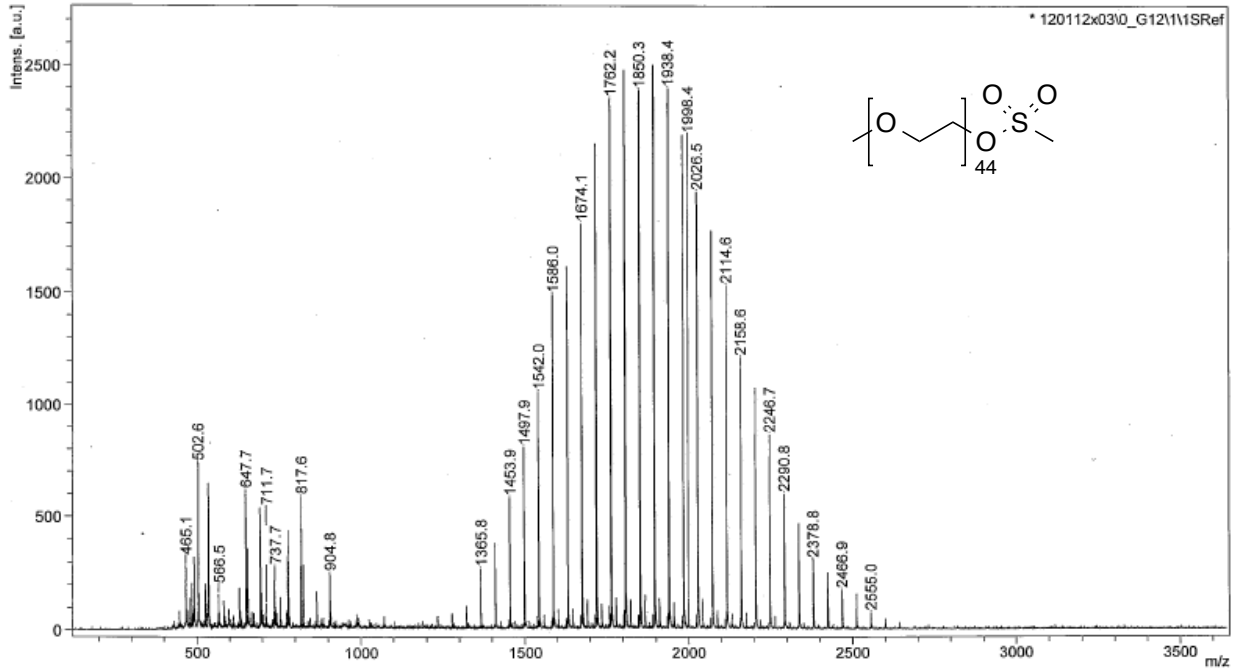

Bruker Ultraflex III, Chem. Dept., Univ. Wisconsin, Cite: NIH NCRR 1S10RR024601-01

printed: 1/12/2012 11:56:35 AM

D:\Data\mmv\120112x08\0\_g141

Comment 1 Tucker 120 // CHCA // RP\_ProtMix.par

Comment 2 350 shots, 45% lp (72), 1920-14859d

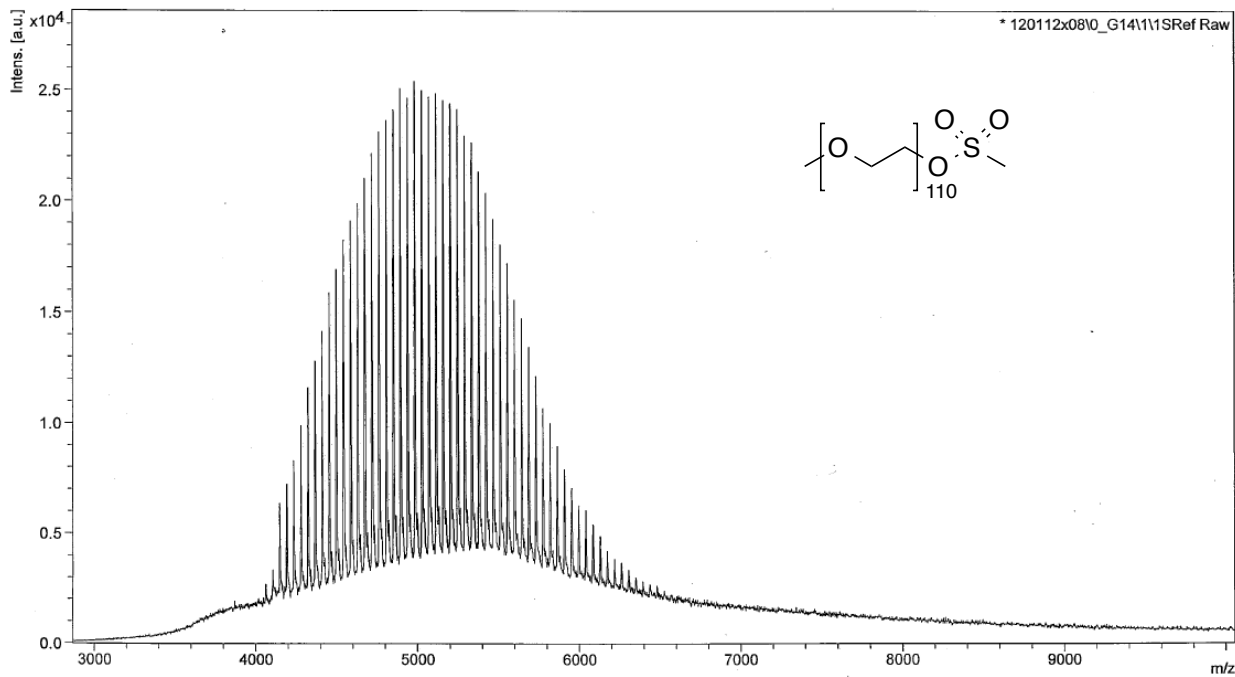

Bruker Ultraflex III, Chem. Dept., Univ. Wisconsin, Cite: NIH NCRR 1S10RR024601-01

printed: 1/12/2012 12:28:14 PM

D:\Data\mmv\130213x01\0\_A121

Comment 1 Tucker 578 // CHCA // RP\_PepMix.par

Comment 2 250 shots, 30% lp, 120-3640d

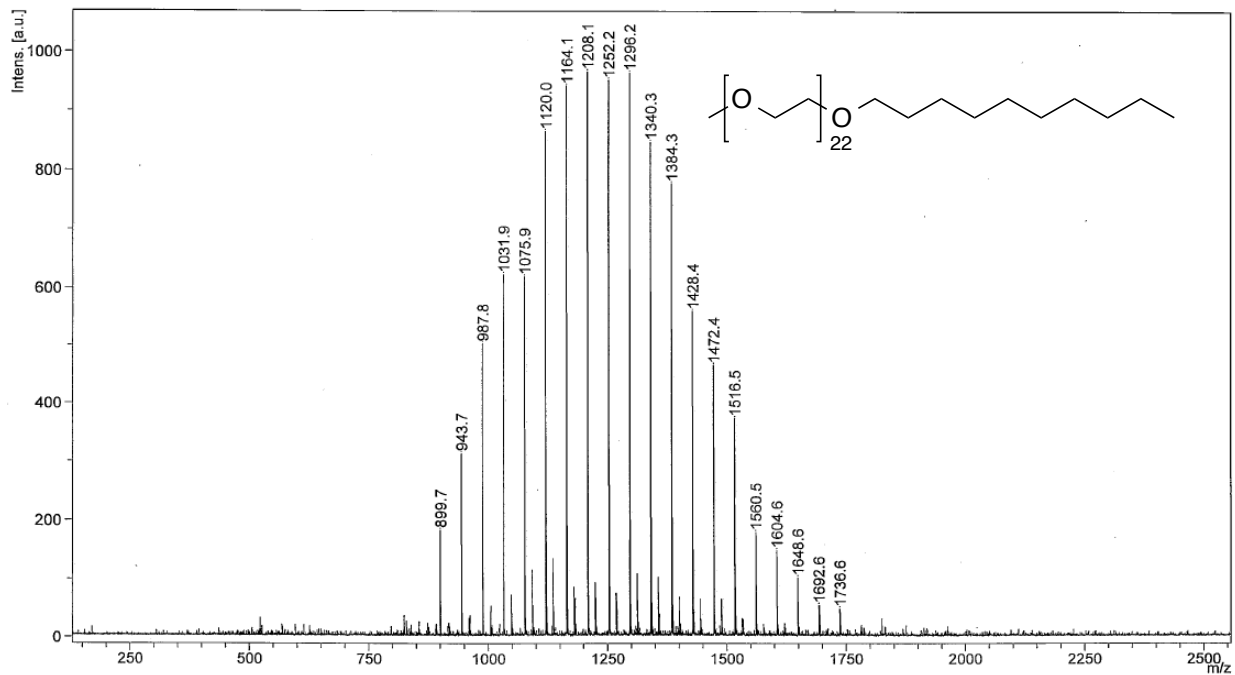

Bruker Ultraflex III, Chem. Dept., Univ. Wisconsin, Cite: NIH NCRR 1S10RR024601-01

printed: 2/13/2013 11:25:12 AM

D:\Data\mmv\130828x0610\_E11

Comment 1 Tucker 3388 // dhb // RP\_PepMix.par  
Comment 2 150 shots, 25% lp (74)

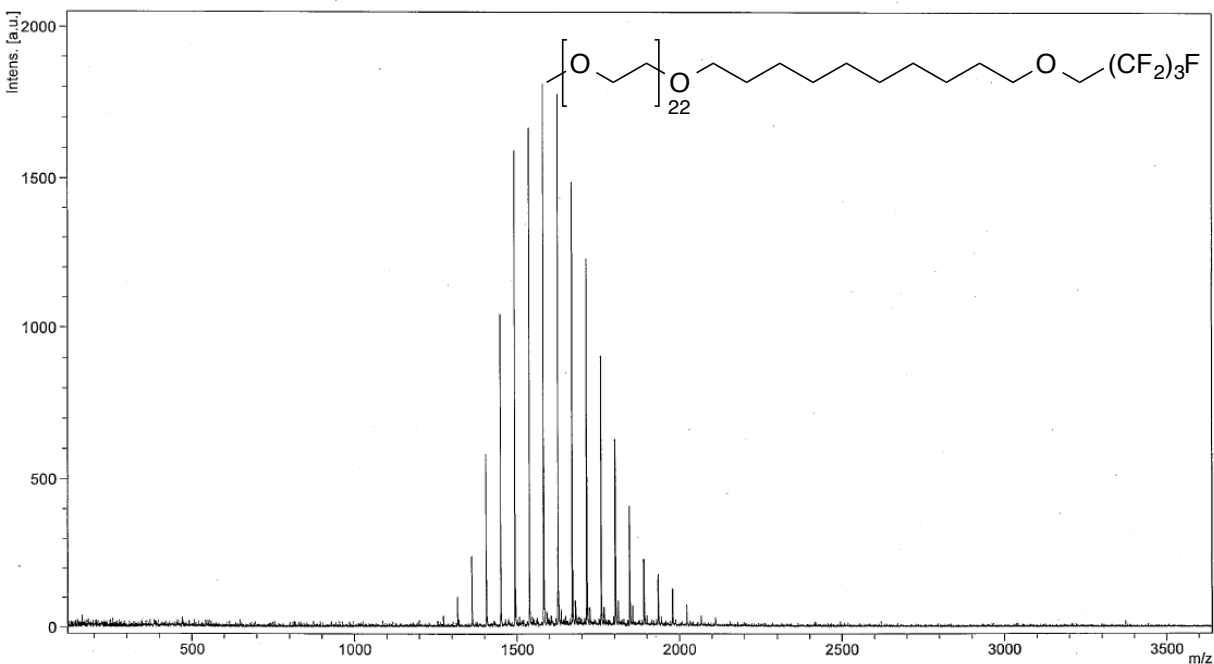

Bruker Ultraflex III, Chem. Dept., Univ. Wisconsin, Cite: NIH NCRR 1S10RR024601-01

printed: 8/28/2013 3:43:05 PM

D:\Data\mmv\130627x0710\_n91

Comment 1 Tucker 2228 // dhb // RP\_PepMix.par  
Comment 2 300 shots, 40% lp (72)

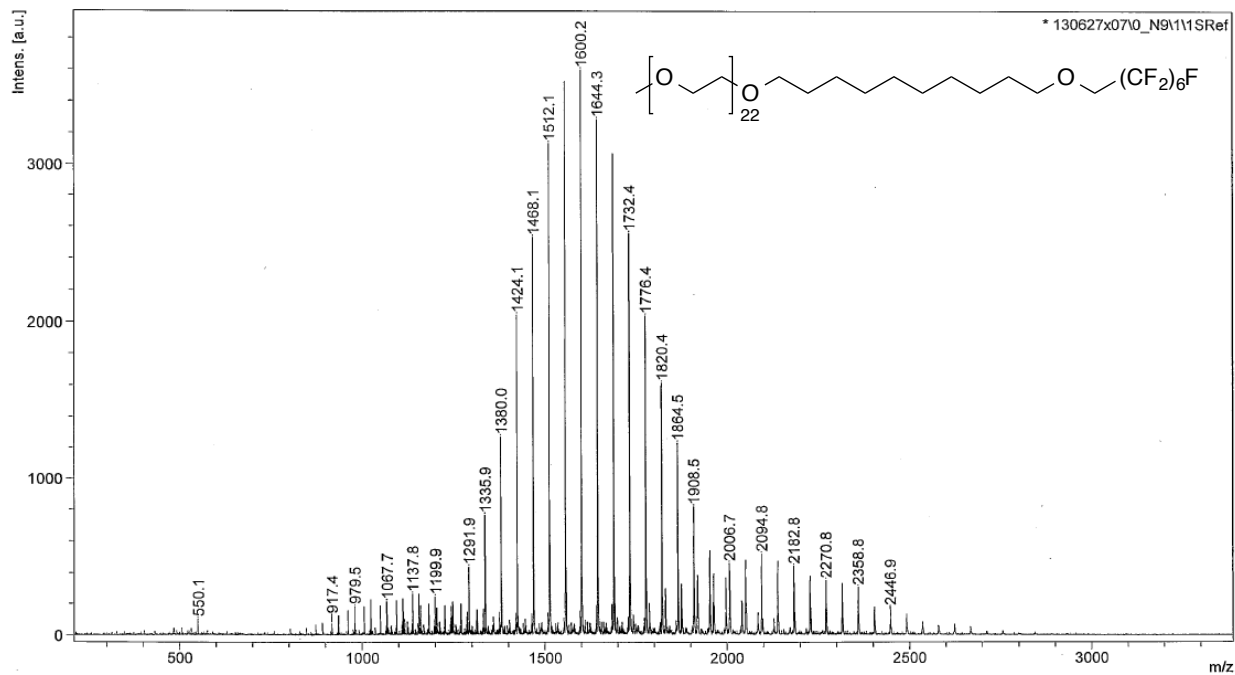

Bruker Ultraflex III, Chem. Dept., Univ. Wisconsin, Cite: NIH NCRR 1S10RR024601-01

printed: 6/27/2013 1:39:32 PM

D:\Data\mmv120925x0610\_D611

Comment 1 Tucker 4028// dnb // RP\_PepMix.par  
Comment 2 400 shots, 50% lp (72) d

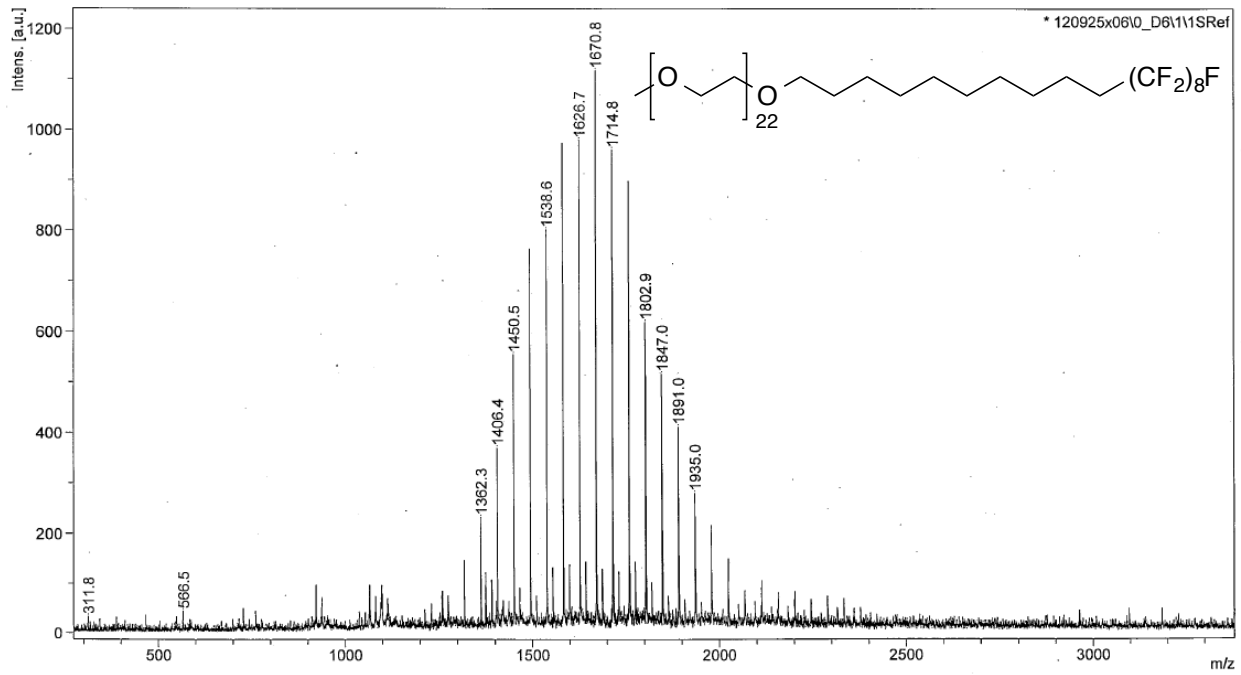

Bruker Ultraflex III, Chem. Dept., Univ. Wisconsin, Cite: NIH NCRR 1S10RR024601-01

printed: 9/25/2012 11:58:32 AM

D:\Data\Mecozzi\140226x0110\_1151

Comment 1 Fleetwood 646 // CHCA // RP\_PepMix.par  
Comment 2 100 shots, 80% lp (74)

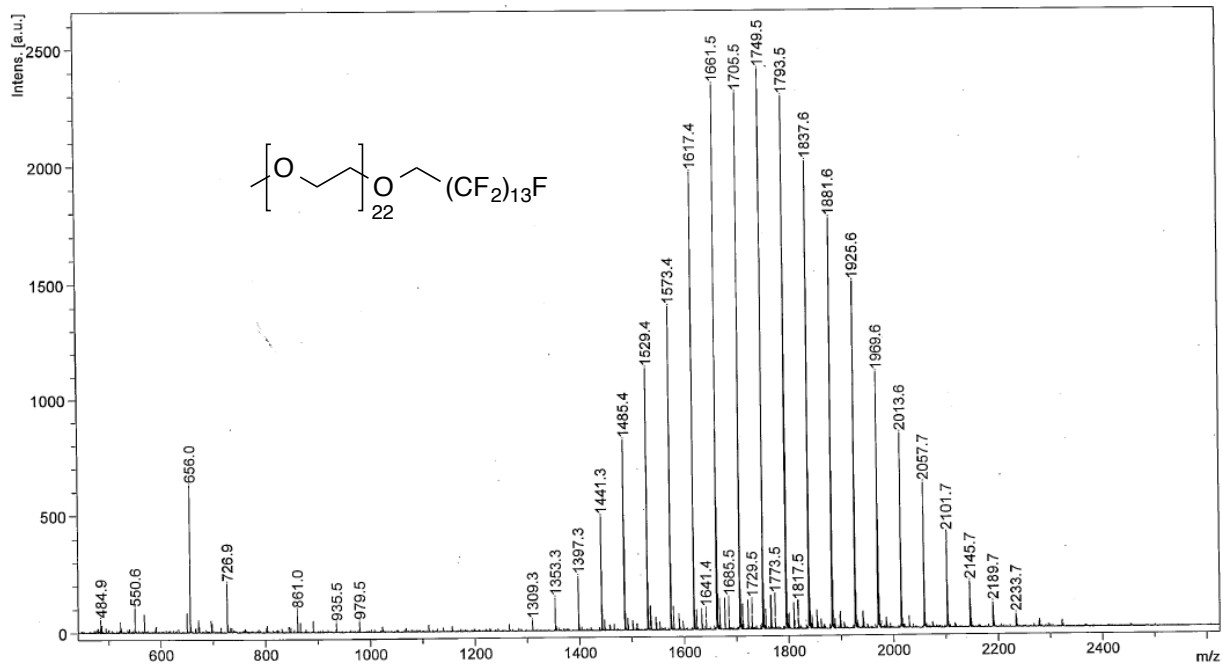

Bruker Ultraflex III, Chem. Dept., Univ. Wisconsin, Cite: NIH NCRR 1S10RR024601-01

printed: 2/26/2014 9:54:29 AM

D:\Data\mmv110906x110\_c71

Comment 1 Tucker 2962 // CHCA // RPPepMix.par  
Comment 2 650 shots, 37% lp (68), 2980-8020

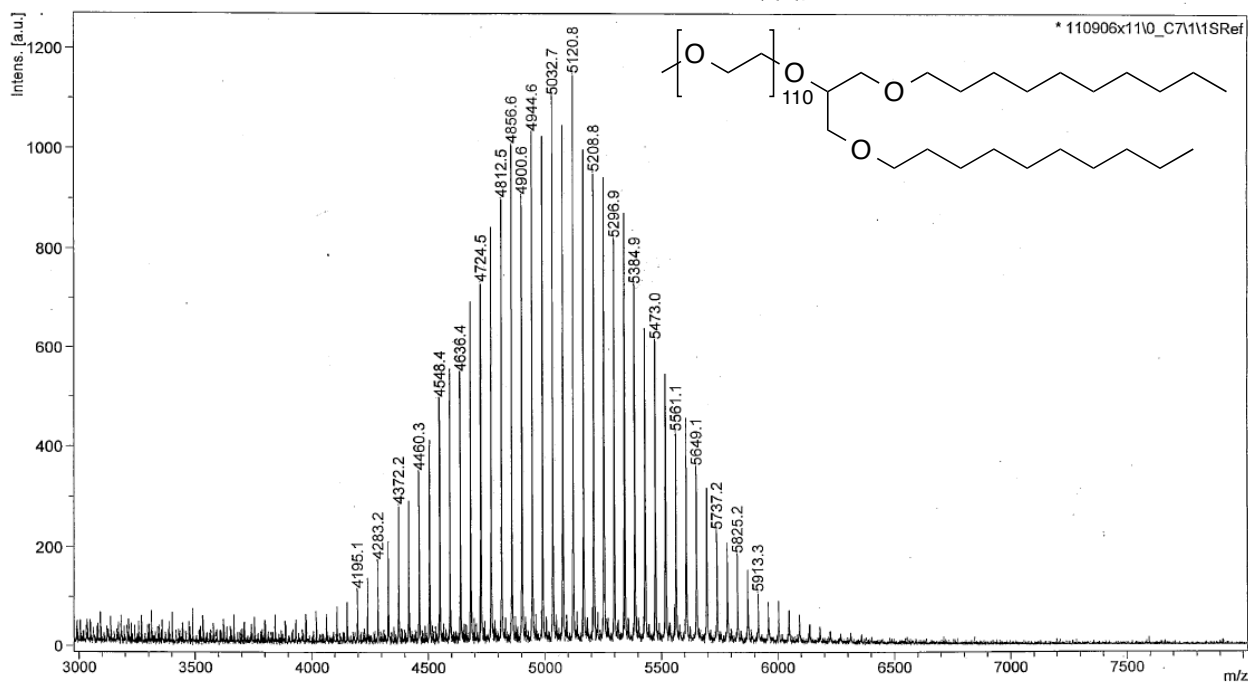

Bruker Ultraflex III, Chem. Dept., Univ. Wisconsin, Cite: NIH NCRR 1S10RR024601-01

printed: 9/6/2011 5:15:39 PM

D:\Data\mmv1130529x080\_e171

Comment 1 Tucker 1949 // dhb // RP\_PepMix.par  
Comment 2 550shots, 52 % LP (72) 1000-9000

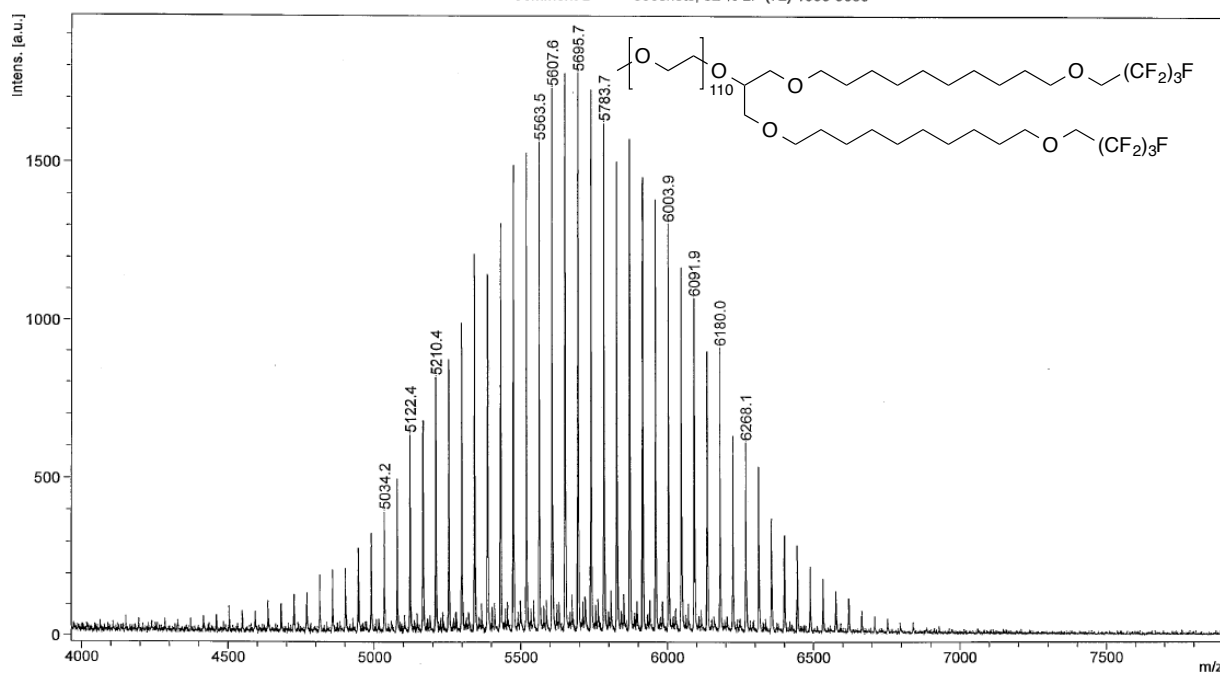

Bruker Ultraflex III, Chem. Dept., Univ. Wisconsin, Cite: NIH NCRR 1S10RR024601-01

printed: 5/29/2013 3:35:20 PM

D:\Data\Mecozzi\140327x03\0\_G19\1

Comment 1 Tucker 1063 // CHCA // RP\_ProtMix.par  
Comment 2 400 shots, 30% lp (74)

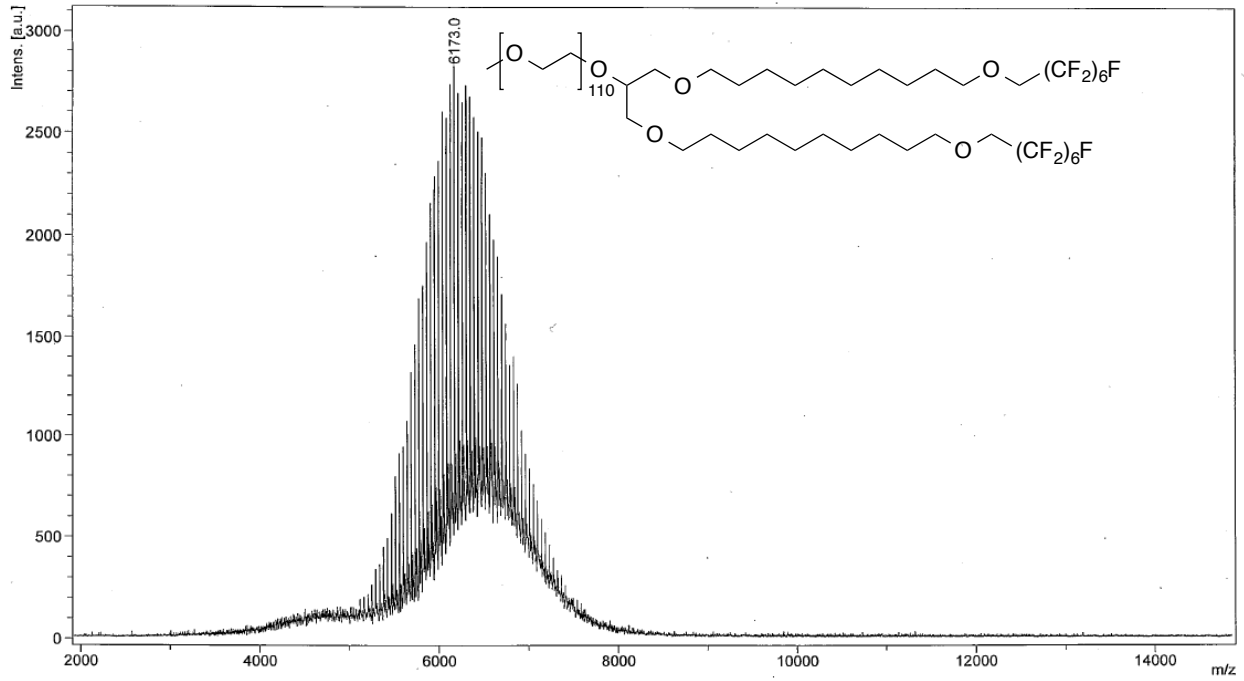

Bruker Ultraflex III, Chem. Dept., Univ. Wisconsin, Cite: NIH NCR 1S10RR024601-01

printed: 3/27/2014 3:07:58 PM

D:\Data\mmv\131125x02\0\_E9\1

Comment 1 McCoy 4266 // CHCA // RP\_PepMix.par  
Comment 2 100 shots, 70% lp (72)

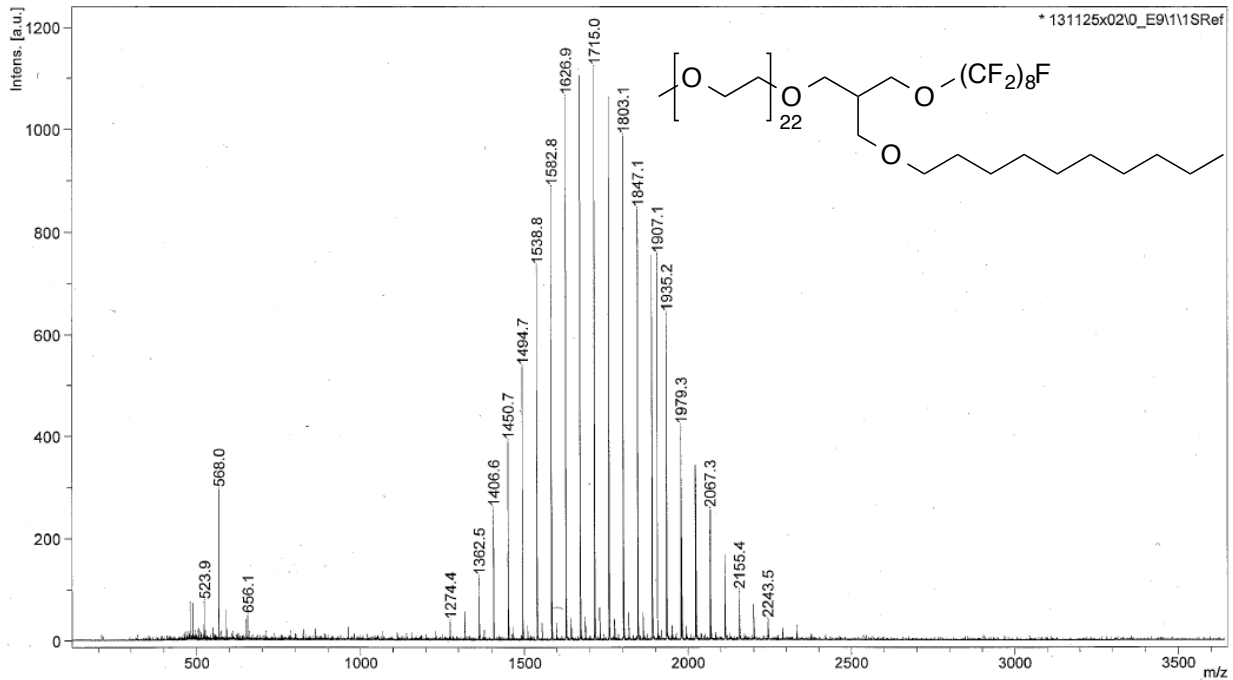

Bruker Ultraflex III, Chem. Dept., Univ. Wisconsin, Cite: NIH NCR 1S10RR024601-01

printed: 11/25/2013 12:06:25 PM

D:\Data\mmv1140218x0910\_E151

Comment 1 McCoy 549 // CHCA // RP\_PepMix.par  
Comment 2 150 shots, 45% lp (76)

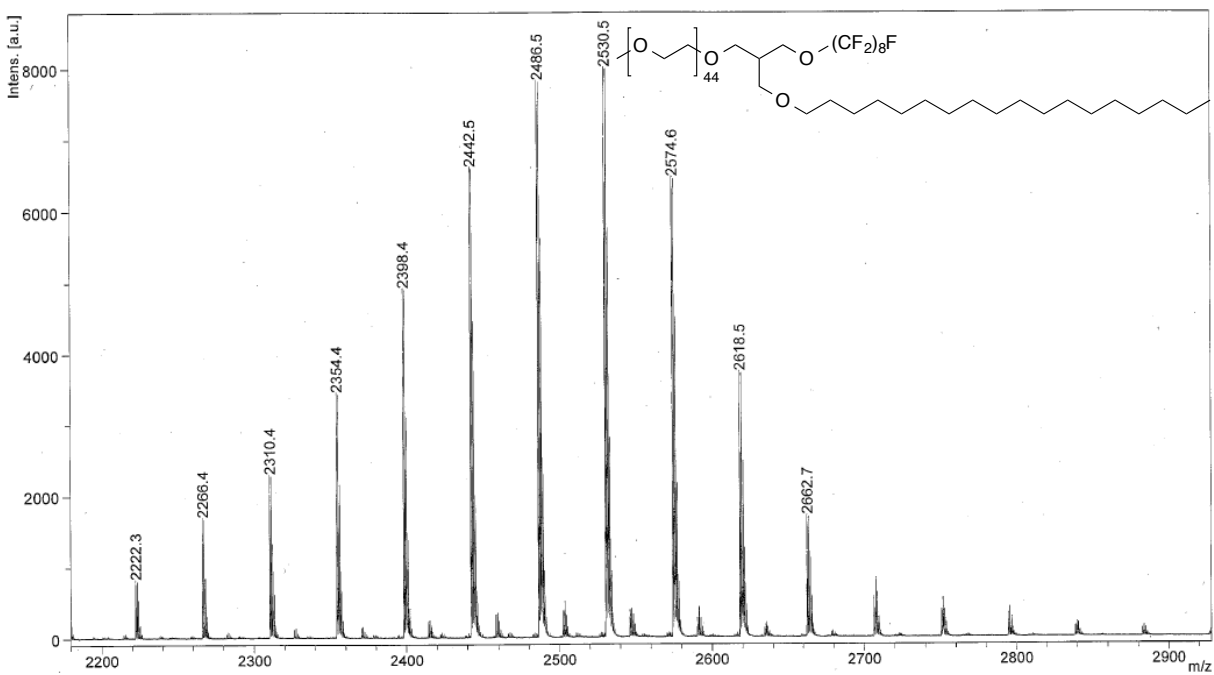

Bruker Ultraflex III, Chem. Dept., Univ. Wisconsin, Cite: NIH NCRR 1S10RR024601-01

printed: 2/18/2014 11:30:41 AM

D:\Data\mmv1130529x0410\_C171

Comment 1 McCoy 1975 // dhb // RP\_PepMix.par  
Comment 2 400 shots, 42 % LP (72)

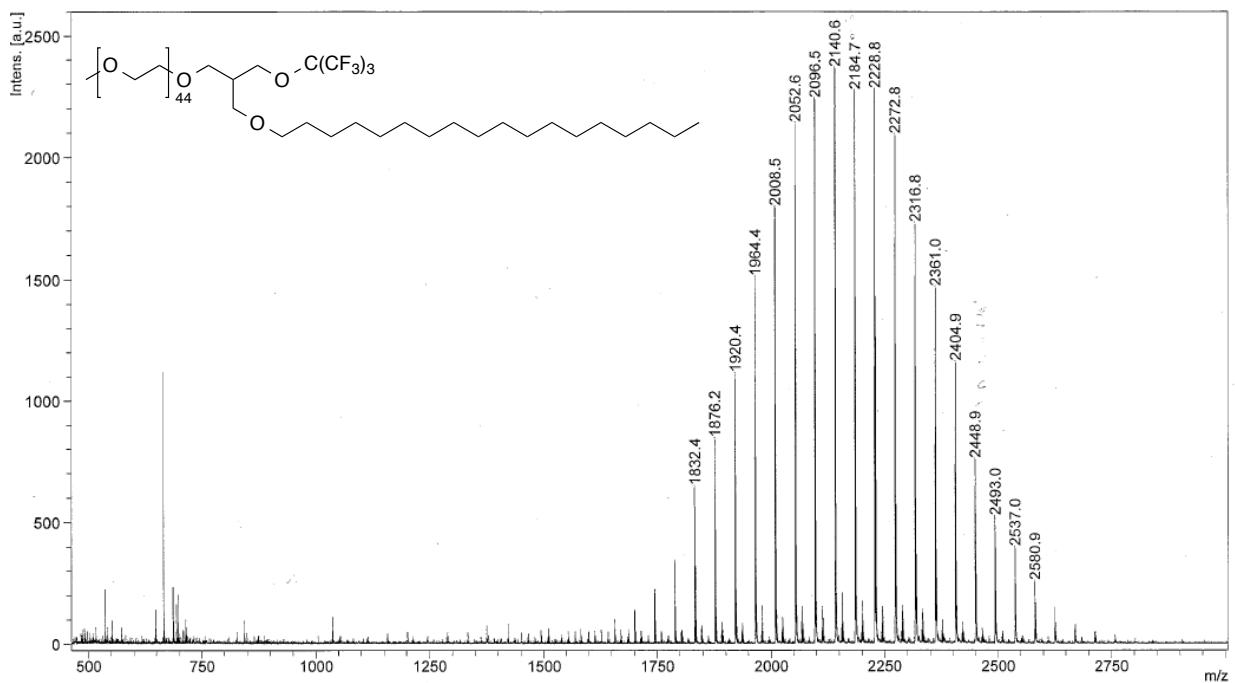

Bruker Ultraflex III, Chem. Dept., Univ. Wisconsin, Cite: NIH NCRR 1S10RR024601-01

printed: 5/29/2013 3:18:10 PM



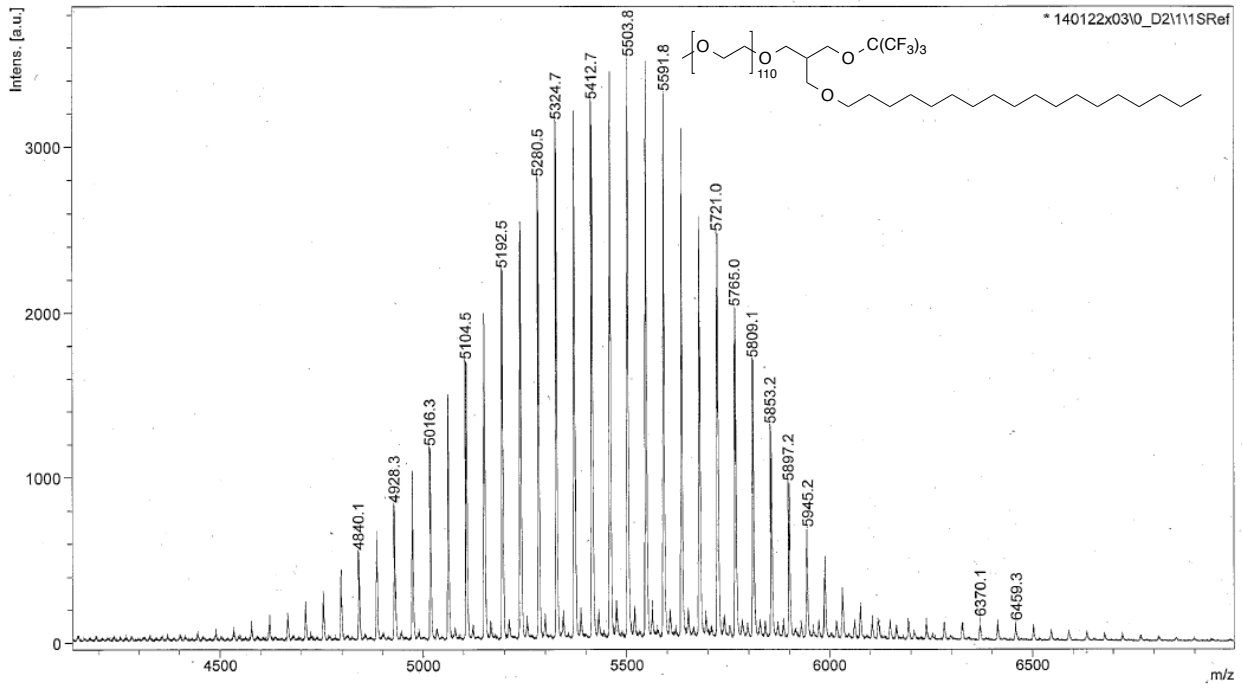

## Surface tension data

### *M5diH10*

| log(M) | Ave. S.T.<br>(mN/m) | Std. Dev. |
|--------|---------------------|-----------|
| -1.93  | 33.968              | 0.128     |
| -2.93  | 34.628              | 0.193     |
| -3.93  | 34.585              | 0.087     |
| -4.93  | 45.578              | 0.463     |
| -5.93  | 54.657              | 0.211     |
| -6.93  | 65.677              | 0.132     |
| -7.93  | 72.330              | 0.400     |
| -8.93  | 72.230              | 0.124     |
| -9.93  | 72.063              | 0.100     |

### *M5diH10-O-F3*

| log(M) | Ave. S.T.<br>(mN/m) | Std. Dev. |
|--------|---------------------|-----------|
| -2.00  | 40.300              | 0.966     |
| -2.98  | 39.104              | 0.566     |
| -3.87  | 39.236              | 0.049     |
| -4.87  | 44.913              | 0.114     |
| -5.87  | 54.169              | 0.042     |
| -6.87  | 69.256              | 0.067     |
| -7.87  | 72.245              | 0.076     |
| -8.87  | 72.248              | 0.209     |
| -9.87  | 72.380              | 0.108     |

### *M1H10*

| log(M) | Ave. S.T.<br>(mN/m) | Std. Dev. |
|--------|---------------------|-----------|
| -2.00  | 36.491              | 0.550     |
| -2.50  | 35.170              | 0.245     |
| -3.00  | 36.054              | 0.689     |
| -3.50  | 42.887              | 0.243     |
| -4.00  | 48.846              | 0.185     |
| -4.50  | 56.902              | 0.204     |
| -5.00  | 59.178              | 0.560     |
| -6.00  | 62.912              | 0.155     |
| -7.00  | 68.616              | 0.147     |
| -8.00  | 72.051              | 0.175     |
| -9.00  | 72.198              | 0.126     |

### *M1H10-O-F3*

| log(M) | Ave. S.T.<br>(mN/m) | Std. Dev. |
|--------|---------------------|-----------|
| -2.00  | 34.978              | 0.227     |
| -3.00  | 35.366              | 0.145     |
| -3.50  | 35.349              | 0.065     |
| -4.00  | 38.230              | 0.149     |
| -5.00  | 48.457              | 0.214     |
| -6.00  | 58.153              | 0.027     |
| -7.00  | 72.238              | 0.117     |
| -8.00  | 71.986              | 0.141     |
| -9.00  | 72.094              | 0.156     |

### *M1H10-O-F6*

| log(M) | Ave. S.T.<br>(mN/m) | Std. Dev. |
|--------|---------------------|-----------|
| -2.00  | 16.436              | 0.138     |
| -3.00  | 16.730              | 0.263     |
| -4.00  | 17.441              | 0.348     |
| -5.00  | 26.609              | 1.100     |
| -6.00  | 53.668              | 0.210     |
| -7.00  | 71.598              | 0.102     |
| -8.00  | 71.744              | 0.059     |
| -9.00  | 71.865              | 0.051     |
| -10.00 | 72.065              | 0.093     |
| -11.00 | 72.058              | 0.139     |
| -12.00 | 72.204              | 0.571     |

### *M1H10F8*

| log(M) | Ave. S.T.<br>(mN/m) | Std. Dev. |
|--------|---------------------|-----------|
| -2.00  | 27.736              | 0.131     |
| -3.00  | 31.598              | 0.203     |
| -4.00  | 33.664              | 0.181     |
| -5.00  | 35.687              | 0.057     |
| -5.90  | 42.873              | 0.365     |
| -6.00  | 50.397              | 0.180     |
| -6.15  | 71.696              | 0.045     |
| -6.50  | 71.758              | 0.150     |
| -7.00  | 71.993              | 0.115     |
| -8.00  | 72.101              | 0.158     |
| -9.00  | 72.145              | 0.139     |

*M1F13*

| log(M) | Ave. S.T.<br>(mN/m) | Std. Dev. |
|--------|---------------------|-----------|
| -4.67  | 35.509              | 0.238     |
| -5.45  | 35.971              | 0.333     |
| -5.84  | 36.405              | 0.305     |
| -6.15  | 38.529              | 0.140     |
| -6.62  | 48.849              | 0.255     |
| -7.01  | 59.954              | 0.131     |
| -7.78  | 70.854              | 0.218     |
| -8.56  | 71.610              | 0.186     |
| -9.34  | 71.217              | 0.165     |

*M1 $\mu$ H10F8*

| log(M) | Ave. S.T.<br>(mN/m) | Std. Dev. |
|--------|---------------------|-----------|
| -2.97  | 21.138              | 0.079     |
| -3.26  | 21.206              | 0.057     |
| -3.61  | 22.341              | 0.059     |
| -4.01  | 21.708              | 0.115     |
| -4.30  | 22.566              | 0.095     |
| -4.66  | 23.337              | 0.102     |
| -5.05  | 24.638              | 0.156     |
| -5.34  | 25.737              | 0.082     |
| -5.70  | 30.190              | 0.205     |
| -6.09  | 59.424              | 0.103     |
| -6.38  | 70.603              | 0.077     |
| -6.74  | 72.757              | 0.197     |
| -7.14  | 72.805              | 0.107     |
| -7.42  | 72.877              | 0.086     |
| -7.78  | 72.704              | 0.420     |
| -8.18  | 72.922              | 0.089     |
| -8.46  | 72.876              | 0.133     |
| -8.82  | 72.706              | 0.153     |

*M2 $\mu$ H18F8*

| log(M) | Ave. S.T.<br>(mN/m) | Std. Dev. |
|--------|---------------------|-----------|
| -2.00  | 31.816              | 0.122     |
| -3.00  | 34.337              | 0.230     |
| -4.00  | 36.876              | 0.199     |
| -5.00  | 44.580              | 0.079     |
| -6.00  | 60.375              | 0.140     |
| -7.00  | 71.180              | 0.044     |
| -8.00  | 71.699              | 0.165     |
| -9.00  | 72.085              | 0.126     |
| -10.00 | 71.891              | 0.123     |
| -11.00 | 71.816              | 0.148     |
| -12.00 | 71.674              | 0.150     |

*M2 $\mu$ H18PftB*

| log(M) | Ave. S.T.<br>(mN/m) | Std. Dev. |
|--------|---------------------|-----------|
| -2.44  | 42.980              | 1.425     |
| -3.57  | 45.346              | 1.976     |
| -3.63  | 44.365              | 0.475     |
| -4.61  | 43.736              | 0.655     |
| -5.65  | 55.222              | 0.661     |
| -6.32  | 64.032              | 0.243     |
| -6.69  | 66.661              | 0.113     |
| -7.07  | 70.915              | 0.101     |
| -7.73  | 71.937              | 0.130     |
| -8.78  | 71.983              | 0.024     |
| -9.82  | 71.824              | 0.207     |

*M5μH18PftB*

| log(M) | Ave. S.T.<br>(mN/m) | Std. Dev. |
|--------|---------------------|-----------|
| -3.34  | 49.134              | 1.440     |
| -3.40  | 47.805              | 0.646     |
| -3.48  | 49.808              | 0.461     |
| -3.66  | 49.563              | 3.055     |
| -4.38  | 48.806              | 1.110     |
| -4.52  | 48.180              | 0.116     |
| -4.70  | 49.474              | 0.096     |

|       |        |       |
|-------|--------|-------|
| -5.43 | 51.235 | 0.212 |
| -5.49 | 50.559 | 0.082 |
| -5.56 | 53.418 | 0.146 |
| -5.74 | 54.535 | 0.218 |
| -6.47 | 59.606 | 0.183 |
| -6.53 | 63.624 | 0.152 |
| -7.51 | 71.656 | 0.111 |
| -7.57 | 71.972 | 0.129 |
| -8.55 | 72.455 | 0.075 |
| -8.61 | 72.229 | 0.024 |

Each sample was measured in quadruplicate. The average and standard deviation were then calculated. The CMC value was determined from the intersection of the slope at the crossover point and the slope at high concentrations. The error in the CMC measurement was calculated by applying a weighted, least-squares analysis to the linear sections of interest. The individual uncertainties of the two slopes and intercepts produced by the weighted least squares analysis were then propagated through as follows:

$$x_{\log(M)} = \frac{b_2 - b_1}{m_2 - m_1}$$

$$\sigma_{x_{\log(m)}} = \sqrt{x_{\log(m)}^2 \left[ \left( \frac{\sigma_{b_2 - b_1}}{b_2 - b_1} \right)^2 + \left( \frac{\sigma_{m_1 - m_2}}{m_1 - m_2} \right)^2 \right]}$$

where

$$\sigma_{m_1 - m_2} = \sqrt{\sigma_{m_1}^2 + \sigma_{m_2}^2}, \quad \sigma_{b_2 - b_1} = \sqrt{\sigma_{b_2}^2 + \sigma_{b_1}^2}$$

The weighted, least-squares analysis was chosen because the uncertainty of each individual data point was known.

## Pyrene CMC data

M5diH10-O-F6

| Log(M) | Total Fluorescence | Total Fluorescence | Total Fluorescence |
|--------|--------------------|--------------------|--------------------|
| -8     | 2.99               | 5.16               | 1.39               |
| -7     | 2.56               | 6.18               | 3.41               |
| -6     | 1.97               | 6.04               | 4.58               |
| -5.499 | 2.59               | 4.75               | 5.36               |
| -4.999 | 5.96               | 11.93              | 15.38              |
| -4.749 | 38.82              | 40.16              | 45.01              |
| -4.499 | 62.49              | 67.98              | 66.12              |

Plot, with linear fit, for each data

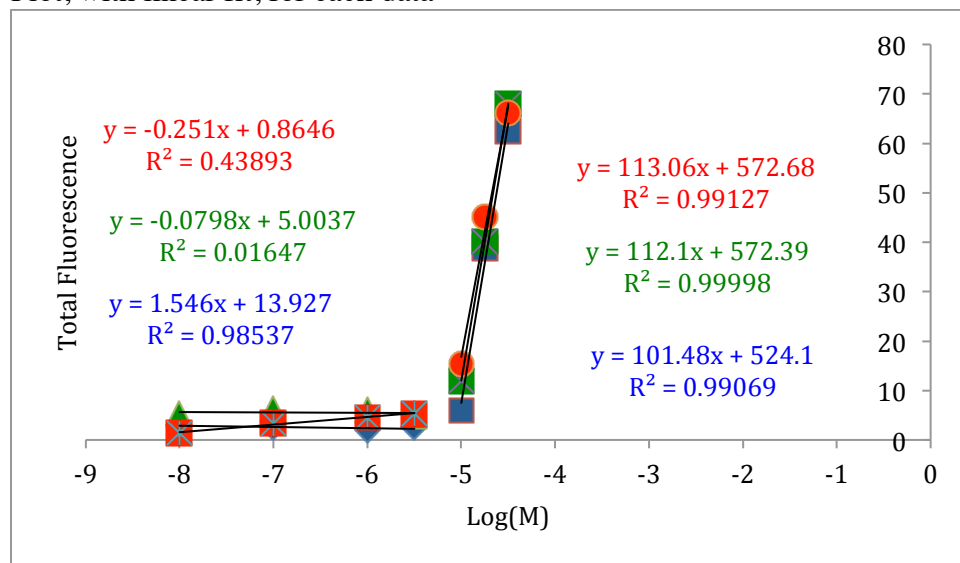

Average of crossover points

|        |           |
|--------|-----------|
| -5.070 | Ave       |
| 0.031  | Std. dev. |

M5H10F8

| Log(M) | Total Fluorescence | Total Fluorescence | Total Fluorescence |
|--------|--------------------|--------------------|--------------------|
| -9     | 4.08               | 8.35               | 2.76               |
| -8     | 4.07               | 8.91               | 2.92               |
| -7     | 3.08               | 9.62               | 3.2                |
| -6     | 2.91               | 3.91               | 3.42               |
| -5.5   | 6.29               | 12.22              | 7.15               |
| -5.25  | 52.08              | 16.8               | 14.34              |
| -5     | 70.22              | 30.93              | 22.55              |

Plot, with linear fit, for each data

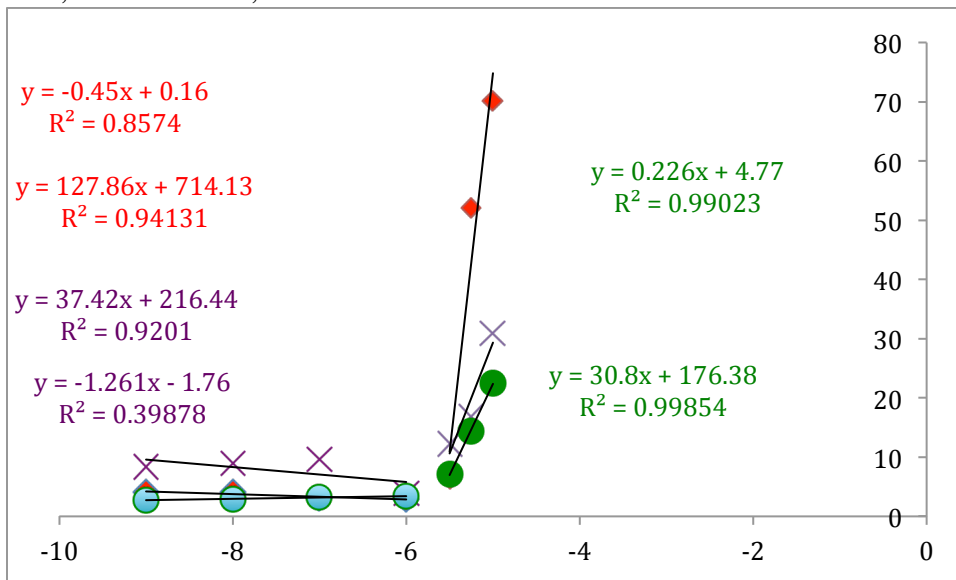

Average of crossover points

|           |        |
|-----------|--------|
| Ave       | -5.606 |
| Std. dev. | 0.039  |

## Microviscosity data

### M1H10

|      |      | <i>Im/Ie</i> |           |
|------|------|--------------|-----------|
|      |      | <i>Ratio</i> |           |
| 376  | 480  |              |           |
| 1.95 | 0.72 | 2.71         |           |
| 2.34 | 0.81 | 2.89         |           |
| 2.22 | 0.83 | 2.66         |           |
|      |      | <hr/>        |           |
|      |      | 2.75         | Ave       |
|      |      | 0.11         | Std. Dev. |

### M1H10-O-F3

|      |      | <i>Im/Ie</i> |           |
|------|------|--------------|-----------|
|      |      | <i>Ratio</i> |           |
| 376  | 480  |              |           |
| 2.77 | 0.46 | 6.06         |           |
| 3.89 | 0.62 | 6.28         |           |
| 3.59 | 0.64 | 5.65         |           |
|      |      | <hr/>        |           |
|      |      | 5.99         | Ave       |
|      |      | 0.32         | Std. Dev. |

### M1H10-o-F6

|      |      | <i>Im/Ie</i> |           |
|------|------|--------------|-----------|
|      |      | <i>Ratio</i> |           |
| 376  | 480  |              |           |
| 3.53 | 0.57 | 6.23         |           |
| 2.30 | 0.35 | 6.47         |           |
| 2.38 | 0.39 | 6.09         |           |
|      |      | <hr/>        |           |
|      |      | 6.26         | Ave       |
|      |      | 0.19         | Std. Dev. |

### M1H10F8

|      |      | <i>Im/Ie</i> |           |
|------|------|--------------|-----------|
|      |      | <i>Ratio</i> |           |
| 376  | 480  |              |           |
| 2.55 | 0.37 | 6.91         |           |
| 2.78 | 0.41 | 6.81         |           |
| 2.54 | 0.38 | 6.70         |           |
|      |      | <hr/>        |           |
|      |      | 6.81         | Ave       |
|      |      | 0.11         | Std. Dev. |

### M1F13

|      |      | <i>Im/Ie</i> |           |
|------|------|--------------|-----------|
|      |      | <i>Ratio</i> |           |
| 376  | 480  |              |           |
| 1.54 | 0.44 | 3.50         |           |
| 1.50 | 0.47 | 3.19         |           |
| 1.40 | 0.40 | 3.50         |           |
|      |      | <hr/>        |           |
|      |      | 3.40         | Ave       |
|      |      | 0.18         | Std. Dev. |

**M5diH10**

| 376  | 480  | <i>Im/Ie</i><br><i>Ratio</i> |           |
|------|------|------------------------------|-----------|
| 1.59 | 0.47 | 3.38                         |           |
| 1.48 | 0.39 | 3.79                         |           |
| 1.54 | 0.41 | 3.76                         |           |
|      |      | <hr/>                        |           |
|      |      | 3.64                         | Ave       |
|      |      | 0.23                         | Std. Dev. |

**M5diH10-O-F3**

| 376  | 480  | <i>Im/Ie</i><br><i>Ratio</i> |           |
|------|------|------------------------------|-----------|
| 2.83 | 0.41 | 6.90                         |           |
| 2.96 | 0.44 | 6.73                         |           |
| 2.26 | 0.34 | 6.65                         |           |
|      |      | <hr/>                        |           |
|      |      | 6.76                         | Ave       |
|      |      | 0.13                         | Std. Dev. |

**M5diH10-O-F6**

| 376  | 480  | <i>Im/Ie</i><br><i>Ratio</i> |           |
|------|------|------------------------------|-----------|
| 2.06 | 0.31 | 6.68                         |           |
| 2.32 | 0.33 | 7.01                         |           |
| 2.47 | 0.36 | 6.79                         |           |
|      |      | <hr/>                        |           |
|      |      | 6.83                         | Ave       |
|      |      | 0.17                         | Std. Dev. |

**M1 $\mu$ H10F8**

| 376  | 480  | <i>Im/Ie</i><br><i>Ratio</i> |           |
|------|------|------------------------------|-----------|
| 2.59 | 0.51 | 5.12                         |           |
| 2.22 | 0.44 | 5.01                         |           |
| 2.31 | 0.45 | 5.12                         |           |
|      |      | <hr/>                        |           |
|      |      | 5.08                         | Ave       |
|      |      | 0.06                         | Std. Dev. |

**M2 $\mu$ H18F8**

| 376  | 480  | <i>Im/Ie</i><br><i>Ratio</i> |           |
|------|------|------------------------------|-----------|
| 2.11 | 0.39 | 5.45                         |           |
| 2.54 | 0.48 | 5.30                         |           |
| 2.28 | 0.42 | 5.39                         |           |
|      |      | <hr/>                        |           |
|      |      | 5.38                         | Ave       |
|      |      | 0.08                         | Std. Dev. |



**M2 $\mu$ H18PftB**

|      |      | <i>Im/Ie</i> |           |
|------|------|--------------|-----------|
|      |      | <i>Ratio</i> |           |
| 376  | 480  |              |           |
| 2.25 | 0.51 | 4.45         |           |
| 2.31 | 0.51 | 4.50         |           |
| 1.98 | 0.46 | 4.34         |           |
|      |      | <hr/>        |           |
|      |      | 4.43         | Ave       |
|      |      | 0.08         | Std. Dev. |

**M2DSPE**

|      |      | <i>Im/Ie</i> |           |
|------|------|--------------|-----------|
|      |      | <i>Ratio</i> |           |
| 376  | 480  |              |           |
| 2.63 | 0.46 | 5.72         |           |
| 3.21 | 0.60 | 5.35         |           |
| 2.53 | 0.44 | 5.75         |           |
|      |      | <hr/>        |           |
|      |      | 5.61         | Ave       |
|      |      | 0.22         | Std. Dev. |

**M5 $\mu$ H18PftB**

|      |      | <i>Im/Ie</i> |           |
|------|------|--------------|-----------|
|      |      | <i>Ratio</i> |           |
| 376  | 480  |              |           |
| 2.36 | 0.55 | 4.28         |           |
| 2.62 | 0.63 | 4.17         |           |
| 2.11 | 0.49 | 4.30         |           |
|      |      | <hr/>        |           |
|      |      | 4.25         | Ave       |
|      |      | 0.07         | Std. Dev. |

**M5DSPE**

|      |      | <i>Im/Ie</i> |           |
|------|------|--------------|-----------|
|      |      | <i>Ratio</i> |           |
| 376  | 480  |              |           |
| 1.51 | 0.29 | 5.21         |           |
| 2.02 | 0.39 | 5.22         |           |
| 2.32 | 0.44 | 5.27         |           |
|      |      | <hr/>        |           |
|      |      | 5.23         | Ave       |
|      |      | 0.03         | Std. Dev. |

### FRET stability data

M1H10 was not analyzed because it did not form micelles

M1F13 was not analyzed because the lipophilic FRET dyes could not be encapsulated

FRET Ratio:  $\frac{I_{565}}{(I_{501}+I_{565})}$ , where  $I_{501}$  = emission of donor dye and  $I_{565}$  = emission of acceptor dye

|             | <b>M1H10-O-F3</b> |                  | <b>M1H10-O-F6</b> |                  | <b>M1H10F8</b>    |                  |
|-------------|-------------------|------------------|-------------------|------------------|-------------------|------------------|
| <b>Min.</b> | <b>FRET Ratio</b> | <b>Std. Dev.</b> | <b>FRET Ratio</b> | <b>Std. Dev.</b> | <b>FRET Ratio</b> | <b>Std. Dev.</b> |
| <b>0</b>    | 0.742             | 0.017            | 0.816             | 0.025            | 0.813             | 0.007            |
| <b>15</b>   | 0.702             | 0.008            | 0.811             | 0.008            | 0.814             | 0.012            |
| <b>30</b>   | 0.692             | 0.038            | 0.801             | 0.004            | 0.816             | 0.013            |
| <b>45</b>   | 0.680             | 0.014            | 0.804             | 0.005            | 0.815             | 0.009            |
| <b>60</b>   | 0.680             | 0.024            | 0.784             | 0.007            | 0.808             | 0.008            |
| <b>75</b>   | 0.669             | 0.012            | 0.749             | 0.006            | 0.757             | 0.005            |
| <b>90</b>   | 0.661             | 0.003            | 0.732             | 0.004            | 0.750             | 0.008            |
| <b>105</b>  | 0.617             | 0.008            | 0.728             | 0.001            | 0.733             | 0.003            |
| <b>120</b>  | 0.587             | 0.030            | 0.710             | 0.005            | 0.692             | 0.001            |

|             | <b>M5diH10</b>    |                  | <b>M5diH10F3</b>  |                  | <b>M5diH10-O-F6</b> |                  |
|-------------|-------------------|------------------|-------------------|------------------|---------------------|------------------|
| <b>Min.</b> | <b>FRET Ratio</b> | <b>Std. Dev.</b> | <b>FRET Ratio</b> | <b>Std. Dev.</b> | <b>FRET Ratio</b>   | <b>Std. Dev.</b> |
| <b>0</b>    | 0.642             | 0.124            | 0.892             | 0.064            | 0.843               | 0.119            |
| <b>15</b>   | 0.499             | 0.081            | 0.658             | 0.022            | 0.800               | 0.036            |
| <b>30</b>   | 0.471             | 0.042            | 0.531             | 0.023            | 0.749               | 0.016            |
| <b>45</b>   | 0.459             | 0.071            | 0.459             | 0.010            | 0.724               | 0.035            |
| <b>60</b>   | 0.451             | 0.042            | 0.448             | 0.023            | 0.673               | 0.039            |
| <b>75</b>   | 0.441             | 0.020            | 0.446             | 0.006            | 0.638               | 0.029            |
| <b>90</b>   | 0.439             | 0.035            | 0.429             | 0.025            | 0.612               | 0.035            |
| <b>105</b>  | 0.436             | 0.039            | 0.422             | 0.012            | 0.609               | 0.030            |
| <b>120</b>  | 0.427             | 0.024            | 0.415             | 0.011            | 0.608               | 0.049            |

|             | <b>M1brF8H10</b>  |                  | <b>M2mH18F8</b>   |                  | <b>M2brPftBH18</b> |                  |
|-------------|-------------------|------------------|-------------------|------------------|--------------------|------------------|
| <b>Min.</b> | <b>FRET Ratio</b> | <b>Std. Dev.</b> | <b>FRET Ratio</b> | <b>Std. Dev.</b> | <b>FRET Ratio</b>  | <b>Std. Dev.</b> |
| <b>0</b>    | 0.523             | 0.03             | 0.658             | 0.005            | 0.666              | 0.043            |
| <b>15</b>   | 0.463             | 0.004            | 0.596             | 0.004            | 0.526              | 0.006            |
| <b>30</b>   | 0.448             | 0.003            | 0.565             | 0.002            | 0.500              | 0.004            |
| <b>45</b>   | 0.439             | 0.002            | 0.519             | 0.001            | 0.485              | 0.003            |
| <b>60</b>   | 0.440             | 0.003            | 0.494             | 0.003            | 0.484              | 0.000            |
| <b>75</b>   | 0.437             | 0.003            | 0.476             | 0.003            | 0.484              | 0.001            |
| <b>90</b>   | 0.428             | 0.001            | 0.452             | 0.002            | 0.473              | 0.003            |
| <b>105</b>  | 0.432             | 0.002            | 0.423             | 0.002            | 0.456              | 0.002            |
| <b>120</b>  | 0.423             | 0.004            | 0.430             | 0.002            | 0.469              | 0.001            |

| <b>Min.</b> | <b>M2DSPE</b>     |                  | <b>M5brPftBH18</b> |                  | <b>M5DSPE</b>     |                  |
|-------------|-------------------|------------------|--------------------|------------------|-------------------|------------------|
|             | <b>FRET Ratio</b> | <b>Std. Dev.</b> | <b>FRET Ratio</b>  | <b>Std. Dev.</b> | <b>FRET Ratio</b> | <b>Std. Dev.</b> |
| 0           | 0.789             | 0.013            | 0.661              | 0.014            | 0.702             | 0.027            |
| 15          | 0.723             | 0.018            | 0.530              | 0.013            | 0.589             | 0.125            |
| 30          | 0.695             | 0.011            | 0.459              | 0.007            | 0.548             | 0.125            |
| 45          | 0.660             | 0.014            | 0.411              | 0.006            | 0.533             | 0.077            |
| 60          | 0.634             | 0.010            | 0.385              | 0.005            | 0.504             | 0.046            |
| 75          | 0.621             | 0.016            | 0.359              | 0.003            | 0.481             | 0.022            |
| 90          | 0.616             | 0.013            | 0.346              | 0.003            | 0.471             | 0.039            |
| 105         | 0.626             | 0.003            | 0.334              | 0.010            | 0.452             | 0.042            |
| 120         | 0.626             | 0.011            | 0.321              | 0.001            | 0.444             | 0.027            |

**Paclitaxel encapsulation data**

M1H10 not analyzed as it does not form micelles.

| <b>Amphiphile</b> | <b>Initial Encapsulation<br/>μg/mL (ave ± S.D.) PTX</b> | <b>Remaining After 24 h<br/>μg/mL (ave ± S.D.) PTX</b> |
|-------------------|---------------------------------------------------------|--------------------------------------------------------|
| M2DSPE            | 229.61 ± 5.38                                           | 215.83 ± 6.51                                          |
| M5DSPE            | 187.59 ± 2.93                                           | 184.84 ± 8.08                                          |
| M1F13             | 0                                                       | 0                                                      |
| M5diH10           | 152.17 ± 31.21                                          | 16.94 ± 0.67                                           |
| M5diH10F3         | 199.86 ± 5.65                                           | 125.94 ± 26.75                                         |
| M5diH10F6         | 208.38 ± 15.81                                          | 157.15 ± 17.19                                         |
| M1H10-o-F3        | 152.50 ± 9.10                                           | 19.11 ± 6.61                                           |
| M1H10-o-F6        | 173.43 ± 5.59                                           | 52.10 ± 8.19                                           |
| M1H10F8           | 192.08 ± 6.25                                           | 80.21 ± 27.53                                          |
| M1μH10F8          | 188.44 ± 6.62                                           | 47.27 ± 6.46                                           |
| M2μH18F8          | 166.13 ± 23.39                                          | 115.13 ± 8.75                                          |
| M2μH18PFtB        | 162.22 ± 18.40                                          | 34.78 ± 11.48                                          |
| M5μH18PFtB        | 185.41 ± 20.84                                          | 44.74 ± 16.60                                          |
